# Supplementary material for: Chemolytic depolymerisation of PET: a review
Source: Royal Society of Chemistry journal article supplement (doi:10.1039/d1gc00887k), 2021-01-01
Supplement: d1gc00887k1.pdf [file d1gc00887k1.pdf]

**Supporting Information for**

**Chemolytic depolymerisation of PET: a review**

*Elaine Barnard* (*elaine.barnard@kuleuven.be*)<sup>1§</sup>, *Jose Jonathan Rubio Arias*  
(*josejonathan.rubioarias@kuleuven.be*)<sup>1§</sup>, *Wim Thielemans* (*wim.thielemans@kuleuven.be*)<sup>1\*</sup>

<sup>1</sup> Sustainable Materials Lab, Department of Chemical Engineering, KU Leuven, Campus Kulak Kortrijk,  
Etienne Sabbelaan 53, 8500 Kortrijk, Belgium

§ These authors contributed equally to this review

**Table S1.** Summary of main results found in literature for basic hydrolysis of PET

| Ref | Solvent/PET mass ratio | catalyst/PET mass ratio | Other reagents/PET ratio | Yield TPA | Environmental factor (a.u) | T (°C) | Reaction time (min) | Energy economy (°C*-1min-1) | Environmental energy impact (°C*min) | Solvent   | Catalyst                    |
|-----|------------------------|-------------------------|--------------------------|-----------|----------------------------|--------|---------------------|-----------------------------|--------------------------------------|-----------|-----------------------------|
| 49  | 117                    | 0,002                   | 13,02                    | 0,32      | 88,85                      | 80     | 180                 | 2,22E-05                    | 4,00E+06                             | NaOH (aq) | TOMAB                       |
| 49  | 117                    | 0,002                   | 13,02                    | 0,32      | 88,85                      | 120    | 180                 | 1,48E-05                    | 6,00E+06                             | NaOH (aq) | TOMAB                       |
| 49  | 117                    | 0,047                   | 13,02                    | 0,80      | 35,60                      | 80     | 180                 | 5,56E-05                    | 6,41E+05                             | NaOH (aq) | TOMAB                       |
| 49  | 117                    | 0,047                   | 13,02                    | 1,00      | 28,48                      | 120    | 180                 | 4,63E-05                    | 6,15E+05                             | NaOH (aq) | TOMAB                       |
| 49  | 117                    | 0,002                   | 13,02                    | 0,05      | 568,61                     | 80     | 300                 | 2,08E-06                    | 2,73E+08                             | NaOH (aq) | TOMAB                       |
| 49  | 117                    | 0,002                   | 13,02                    | 0,22      | 129,23                     | 120    | 300                 | 6,11E-06                    | 2,11E+07                             | NaOH (aq) | TOMAB                       |
| 49  | 117                    | 0,047                   | 13,02                    | 0,92      | 30,96                      | 80     | 300                 | 3,83E-05                    | 8,08E+05                             | NaOH (aq) | TOMAB                       |
| 49  | 117                    | 0,047                   | 13,02                    | 1,00      | 28,48                      | 120    | 300                 | 2,78E-05                    | 1,03E+06                             | NaOH (aq) | TOMAB                       |
| 52  | 16,6                   | 0,030                   | 1,67                     | 0,99      | 3,90                       | 90     | 45                  | 2,44E-04                    | 1,60E+04                             | NaOH (aq) | TBAI                        |
| 52  | 16,6                   | 0,030                   | 1,67                     | 0,99      | 3,90                       | 90     | 65                  | 1,69E-04                    | 2,31E+04                             | NaOH (aq) | TBAI                        |
| 52  | 16,6                   | 0,030                   | 0,84                     | 0,51      | 5,70                       | 90     | 45                  | 1,26E-04                    | 4,53E+04                             | NaOH (aq) | TBAI                        |
| 52  | 16,6                   | 0,030                   | 3,34                     | 0,90      | 6,43                       | 90     | 60                  | 1,67E-04                    | 3,86E+04                             | NaOH (aq) | TBAI                        |
| 53  | 9                      | 0,000                   | 1,00                     | 0,98      | 2,22                       | 220    | 5                   | 8,95E-04                    | 2,48E+03                             | NaOH (aq) | Microwave                   |
| 53  | 9,5                    | 0,000                   | 0,50                     | 0,98      | 1,70                       | 220    | 5                   | 8,90E-04                    | 1,91E+03                             | NaOH (aq) | Microwave                   |
| 53  | 9,5                    | 0,000                   | 0,50                     | 0,98      | 1,70                       | 220    | 10                  | 4,47E-04                    | 3,80E+03                             | NaOH (aq) | Microwave                   |
| 53  | 9,5                    | 0,000                   | 0,50                     | 0,97      | 1,72                       | 220    | 2                   | 2,20E-03                    | 7,80E+02                             | NaOH (aq) | Microwave                   |
| 54  | 45                     | 0,000                   | 5,00                     | 0,89      | 12,28                      | 110    | 30                  | 2,70E-04                    | 4,55E+04                             | NaOH (aq) | EtOH:H <sub>2</sub> O 80:20 |

**Table S2** Summary of main results found in literature for acidic hydrolysis of PET

| Ref | Solvent/PET mass ratio | catalyst/PET mass ratio | Other reagents/PET ratio | Yield TPA | Environmental factor (a.u) | T (°C) | Reaction time (min) | Energy economy (°C*<br>1min-1) | Environmental energy impact (°C*min) | Solvent                             | Catalyst                                                            |
|-----|------------------------|-------------------------|--------------------------|-----------|----------------------------|--------|---------------------|--------------------------------|--------------------------------------|-------------------------------------|---------------------------------------------------------------------|
| 45  | 5,1                    | 0,000                   | 6,43                     | 0,90      | 8,87                       | 135    | 300                 | 2,22E-05                       | 3,99E+05                             | H <sub>2</sub> SO <sub>4</sub> (aq) |                                                                     |
| 45  | 5,1                    | 0,000                   | 6,43                     | 0,80      | 9,98                       | 100    | 5760                | 1,39E-06                       | 7,18E+06                             | H <sub>2</sub> SO <sub>4</sub> (aq) |                                                                     |
| 47  | 3,4                    | 1,000                   | 0,67                     | 0,17      | 13,28                      | 98     | 140                 | 1,27E-05                       | 1,05E+06                             | HNO <sub>3</sub>                    | DMSO Na <sub>2</sub> SO <sub>4</sub>                                |
| 47  | 2,696                  | 1,000                   | 1,30                     | 0,35      | 8,46                       | 98     | 140                 | 2,55E-05                       | 3,31E+05                             | HNO <sub>3</sub>                    | DMSO Na <sub>2</sub> SO <sub>4</sub>                                |
| 47  | 1,624                  | 1,000                   | 2,38                     | 0,70      | 5,86                       | 98     | 140                 | 5,07E-05                       | 1,16E+05                             | HNO <sub>3</sub>                    | DMSO Na <sub>2</sub> SO <sub>4</sub>                                |
| 47  | 1,624                  | 1,000                   | 2,38                     | 0,77      | 5,33                       | 110    | 140                 | 4,97E-05                       | 1,07E+05                             | HNO <sub>3</sub>                    | DMSO Na <sub>2</sub> SO <sub>4</sub>                                |
| 47  | 1,624                  | 1,000                   | 2,38                     | 0,87      | 4,68                       | 120    | 140                 | 5,19E-05                       | 9,01E+04                             | HNO <sub>3</sub>                    | DMSO Na <sub>2</sub> SO <sub>4</sub>                                |
| 46  | 3,015                  | 1,050                   | 1,99                     | 0,34      | 11,34                      | 98     | 160                 | 2,16E-05                       | 5,24E+05                             | HNO <sub>3</sub>                    | DMSO Na <sub>2</sub> SO <sub>4</sub> H <sub>3</sub> PO <sub>4</sub> |
| 46  | 1,624                  | 1,050                   | 2,38                     | 0,54      | 7,73                       | 98     | 160                 | 3,41E-05                       | 2,27E+05                             | HNO <sub>3</sub>                    | DMSO Na <sub>2</sub> SO <sub>4</sub> H <sub>3</sub> PO <sub>4</sub> |
| 46  | 1,426                  | 1,050                   | 3,57                     | 0,68      | 8,06                       | 98     | 160                 | 4,34E-05                       | 1,86E+05                             | HNO <sub>3</sub>                    | DMSO Na <sub>2</sub> SO <sub>4</sub> H <sub>3</sub> PO <sub>4</sub> |
| 46  | 1,426                  | 1,050                   | 3,57                     | 0,77      | 7,15                       | 110    | 160                 | 4,36E-05                       | 1,64E+05                             | HNO <sub>3</sub>                    | DMSO Na <sub>2</sub> SO <sub>4</sub> H <sub>3</sub> PO <sub>4</sub> |
| 46  | 1,426                  | 1,050                   | 3,57                     | 0,87      | 6,27                       | 120    | 160                 | 4,55E-05                       | 1,38E+05                             | HNO <sub>3</sub>                    | DMSO Na <sub>2</sub> SO <sub>4</sub> H <sub>3</sub> PO <sub>4</sub> |
| 46  | 1,426                  | 1,050                   | 3,57                     | 0,98      | 5,60                       | 140    | 160                 | 4,37E-05                       | 1,28E+05                             | HNO <sub>3</sub>                    | DMSO Na <sub>2</sub> SO <sub>4</sub> H <sub>3</sub> PO <sub>4</sub> |

**Table S3** Summary of main results found in literature for neutral and enzymatic hydrolysis of PET

| Ref | Solvent/PET mass ratio | catalyst/PET mass ratio | Other reagents/PET ratio | Yield TPA | Environmental factor (a.u) | T (°C) | Reaction time (min) | Energy economy (°C*<br>1min-1) | Environmental energy impact (°C*min) | Solvent/Buffer                        | Catalyst/Enzyme |
|-----|------------------------|-------------------------|--------------------------|-----------|----------------------------|--------|---------------------|--------------------------------|--------------------------------------|---------------------------------------|-----------------|
| 44  | 1000                   | 0,05                    | 0                        | 0,12      | 958,81                     | 200    | 30                  | 2,00E-05                       | 4,79E+07                             | H <sub>2</sub> O                      | No catalyst     |
| 44  | 1000                   | 0,05                    | 0                        | 0,79      | 145,64                     | 200    | 30                  | 1,32E-04                       | 1,11E+06                             | H <sub>2</sub> O                      | ZSM-5-200       |
| 44  | 1000                   | 0,05                    | 0                        | 0,87      | 132,25                     | 200    | 30                  | 1,45E-04                       | 9,12E+05                             | H <sub>2</sub> O                      | ZSM-5-25        |
| 44  | 1000                   | 0,05                    | 0                        | 0,66      | 174,33                     | 170    | 30                  | 1,29E-04                       | 1,35E+06                             | H <sub>2</sub> O                      | ZSM-5-200       |
| 44  | 1000                   | 0,05                    | 0                        | 0,78      | 147,51                     | 170    | 30                  | 1,53E-04                       | 9,64E+05                             | H <sub>2</sub> O                      | ZSM-5-25        |
| 21  | 250                    | 0,025                   | 0                        | 0,43      | 66,93                      | 55     | 30240               | 2,59E-07                       | 2,59E+08                             | 1 M K <sub>2</sub> PO <sub>3</sub>    | T.Fusca         |
| 21  | 250                    | 0,025                   | 0                        | 0,54      | 53,29                      | 55     | 30240               | 3,25E-07                       | 1,64E+08                             | 1 M K <sub>2</sub> PO <sub>3</sub>    | T.Fusca         |
| 25  | 500                    | 0,0005                  | 0                        | 0,82      | 70,12                      | 65     | 1200                | 1,05E-05                       | 6,67E+06                             | 0.2 M K <sub>2</sub> PO <sub>3</sub>  | LCC             |
| 25  | 500                    | 0,0005                  | 0                        | 0,85      | 67,65                      | 65     | 900                 | 1,45E-05                       | 4,66E+06                             | 0.2 M K <sub>2</sub> PO <sub>3</sub>  | ICCG            |
| 25  | 500                    | 0,0005                  | 0                        | 0,53      | 108,49                     | 65     | 1200                | 6,79E-06                       | 1,60E+07                             | 0.2 M K <sub>2</sub> PO <sub>3</sub>  | WCCG            |
| 26  | 1,5                    | 0,006                   | 0                        | 0,19      | 0,94                       | 55     | 10080               | 3,43E-07                       | 2,76E+06                             | 0,1 M Na <sub>2</sub> PO <sub>3</sub> | HiC             |

**Table S4** Summary of main results found in literature for alcoholysis of PET

| Ref | Solvent/PET mass ratio | catalyst/PET mass ratio | Other reagents/PET ratio | Yield TPA | Environmental factor (a.u) | T (°C) | Reaction time (min) | Energy economy (°C*<br>1min-1) | Environmental energy impact (°C*min) | Solvent/Buffer    | Catalyst/Enzyme                                              |
|-----|------------------------|-------------------------|--------------------------|-----------|----------------------------|--------|---------------------|--------------------------------|--------------------------------------|-------------------|--------------------------------------------------------------|
| 27  | 10                     | 0,000                   | 0                        | 0,97      | 1,19                       | 300    | 70                  | 4,62E-05                       | 2,57E+04                             | Methanol          | Supercritical fluid                                          |
| 27  | 10                     | 0,000                   | 0                        | 0,98      | 1,18                       | 310    | 70                  | 4,50E-05                       | 2,61E+04                             | Methanol          | Supercritical fluid                                          |
| 57  | 8                      | 0,000                   | 2                        | 0,03      | 111,03                     | 200    | 120                 | 1,21E-06                       | 9,19E+07                             | Methanol          | Toluene                                                      |
| 57  | 8                      | 0,100                   | 2                        | 0,89      | 3,77                       | 200    | 120                 | 3,69E-05                       | 1,02E+05                             | Methanol          | AlTIP                                                        |
| 57  | 6                      | 0,100                   | 4                        | 0,87      | 6,23                       | 200    | 120                 | 3,62E-05                       | 1,72E+05                             | Methanol          | AlTIP                                                        |
| 57  | 5                      | 0,100                   | 5                        | 0,82      | 7,85                       | 200    | 120                 | 3,42E-05                       | 2,30E+05                             | Methanol          | AlTIP                                                        |
| 57  | 2                      | 0,100                   | 8                        | 0,38      | 25,12                      | 200    | 120                 | 1,58E-05                       | 1,59E+06                             | Methanol          | AlTIP                                                        |
| 62  | 3,4                    | 0,025                   | 0,025                    | 0,84      | 0,53                       | 185    | 160                 | 2,84E-05                       | 1,87E+04                             | 2-ethylhexanol    | Zn(OAc) <sub>2</sub> ChCl                                    |
| 62  | 3,4                    | 0,025                   | 0,025                    | 0,81      | 0,56                       | 185    | 160                 | 2,72E-05                       | 2,04E+04                             | 2-ethylhexanol    | Mn(OAc) <sub>2</sub> ChCl                                    |
| 62  | 3,4                    | 0,025                   | 0,025                    | 0,74      | 0,61                       | 185    | 160                 | 2,50E-05                       | 2,42E+04                             | 2-ethylhexanol    | Co(OAc) <sub>2</sub> ChCl                                    |
| 62  | 3,4                    | 0,025                   | 0,025                    | 0,78      | 0,57                       | 185    | 160                 | 2,65E-05                       | 2,17E+04                             | 2-ethylhexanol    | FeCl <sub>3</sub> ChCl                                       |
| 62  | 3,4                    | 0,025                   | 0                        | 0,41      | 1,03                       | 185    | 160                 | 1,37E-05                       | 7,54E+04                             | 2-ethylhexanol    | Zn(OAc) <sub>2</sub>                                         |
| 62  | 3,4                    | 0,025                   | 0                        | 0,37      | 1,15                       | 185    | 160                 | 1,24E-05                       | 9,28E+04                             | 2-ethylhexanol    | Mn(OAc) <sub>2</sub>                                         |
| 62  | 3,4                    | 0,025                   | 0                        | 0,27      | 1,55                       | 185    | 160                 | 9,16E-06                       | 1,69E+05                             | 2-ethylhexanol    | Co(OAc) <sub>2</sub>                                         |
| 62  | 3,4                    | 0,025                   | 0                        | 0,36      | 1,18                       | 185    | 160                 | 1,21E-05                       | 9,75E+04                             | 2-ethylhexanol    | FeCl <sub>3</sub>                                            |
| 61  | 1                      | 0,000                   | 0,5                      | 0,43      | 1,60                       | 195    | 240                 | 9,23E-06                       | 1,73E+05                             | 2-ethylhexanol    | Zn(OAc) <sub>2</sub><br>[Bmim]Cl                             |
| 61  | 1                      | 0,006                   | 0,5                      | 0,86      | 0,81                       | 195    | 240                 | 1,84E-05                       | 4,42E+04                             | 2-ethylhexanol    | Zn(OAc) <sub>2</sub><br>[Bmim]Cl                             |
| 61  | 1                      | 0,006                   | 0,5                      | 0,87      | 0,80                       | 195    | 240                 | 1,85E-05                       | 4,34E+04                             | 2-ethylhexanol    | Ti(OC <sub>4</sub> H <sub>9</sub> ) <sub>4</sub><br>[Bmim]Cl |
| 64  | 6                      | 0,007                   | 0                        | 0,95      | 0,73                       | 170    | 15                  | 3,73E-04                       | 1,97E+03                             | Methanol          | Modified ZnO                                                 |
| 63  | 3                      | 0,005                   | 0                        | 0,59      | 0,59                       | 210    | 300                 | 9,37E-06                       | 6,35E+04                             | 2,2'-oxydiethanol | ZnAc                                                         |
| 63  | 3                      | 0,050                   | 0                        | 0,64      | 0,63                       | 210    | 300                 | 1,02E-05                       | 6,19E+04                             | 2,2'-oxydiethanol | NaMeSi                                                       |

**Table S5.** Summary of main results found in literature for glycolysis of PET assisted by homogeneous catalysts

| Ref | Solvent/PET mass ratio | Catalyst/PET mass ratio | Yield BHET (%) | Environmental factor (a.u) | T (°C) | Reaction time (min) | Energy economy (°C* <sup>-1</sup> min <sup>-1</sup> ) | Environmental energy impact (°C*min) | Catalyst                                  |
|-----|------------------------|-------------------------|----------------|----------------------------|--------|---------------------|-------------------------------------------------------|--------------------------------------|-------------------------------------------|
| 83  | 1.3                    | 0.005                   | 77.3           | 0.1310                     | 190    | 480                 | 8.476E-06                                             | 15454                                | Manganese acetate                         |
| 83  | 1.3                    | 0.005                   | 79.2           | 0.1278                     | 190    | 480                 | 8.684E-06                                             | 14721                                | Zinc acetate                              |
| 84  | 5                      | 0.01                    | 85.6           | 0.4468                     | 196    | 180                 | 2.426E-05                                             | 18417                                | Zinc acetate                              |
| 85  | 3                      | 0.0033                  | 82.6           | 0.3662                     | 196    | 120                 | 3.512E-05                                             | 10427                                | Zinc acetate                              |
| 86  | 5                      | 0.02                    | 78             | 0.5000                     | 196    | 35                  | 1.137E-04                                             | 4397                                 | Zinc acetate (Microwave)                  |
| 89  | 2.5                    | 0.01                    | 68             | 0.2868                     | 196    | 60                  | 5.782E-05                                             | 4959                                 | Zinc acetate                              |
| 89  | 2.5                    | 0.006                   | 68             | 0.2824                     | 196    | 60                  | 5.782E-05                                             | 4883                                 | Sodium Carbonate                          |
| 90  | 5                      | 0.007                   | 78             | 0.4875                     | 190    | 210                 | 1.955E-05                                             | 24938                                | TBD                                       |
| 93  | 6.5                    | 0.01                    | 91             | 0.5440                     | 180    | 120                 | 4.213E-05                                             | 12911                                | TBD: MSA                                  |
| 94  | 4                      | 0.02                    | 84.1           | 0.3746                     | 185    | 30                  | 1.515E-04                                             | 2472                                 | POM SiW <sub>11</sub> Zn                  |
| 94  | 4                      | 0.02                    | 77.9           | 0.4044                     | 185    | 30                  | 1.404E-04                                             | 2881                                 | POM SiW <sub>11</sub> Mn                  |
| 95  | 4                      | 0.005                   | 84.5           | 0.3595                     | 190    | 40                  | 1.112E-04                                             | 3233                                 | POM WZn <sub>3</sub>                      |
| 95  | 4                      | 0.005                   | 84.5           | 0.3612                     | 190    | 44                  | 1.006E-04                                             | 3590                                 | POM WZnMn <sub>2</sub>                    |
| 95  | 4                      | 0.005                   | 84             | 0.3616                     | 190    | 50                  | 8.842E-05                                             | 4090                                 | POM WZnCo <sub>2</sub>                    |
| 99  | 4                      | 0.1                     | 79.5           | 0.4717                     | 175    | 75                  | 6.057E-05                                             | 7787                                 | [Amim][CoCl <sub>3</sub> ]                |
| 99  | 4                      | 0.1                     | 80.1           | 0.4682                     | 175    | 75                  | 6.103E-05                                             | 7671                                 | [Amim][ZnCl <sub>3</sub> ]                |
| 100 | 4                      | 0.2                     | 89.7           | 0.5017                     | 170    | 240                 | 2.199E-05                                             | 22819                                | [Bmim] <sub>2</sub> [CoCl <sub>4</sub> ]  |
| 100 | 4                      | 0.2                     | 89.5           | 0.5028                     | 170    | 240                 | 2.194E-05                                             | 22921                                | [Bmim] <sub>2</sub> [ZnCl <sub>4</sub> ]  |
| 101 | 7                      | 0.2                     | 99             | 0.6818                     | 170    | 120                 | 4.853E-05                                             | 14050                                | [Dimim][FeCl <sub>4</sub> ]               |
| 102 | 4                      | 0.05                    | 84.5           | 0.3994                     | 180    | 180                 | 2.608E-05                                             | 15315                                | [Ch][For]                                 |
| 102 | 4                      | 0.05                    | 85.2           | 0.3961                     | 180    | 240                 | 1.972E-05                                             | 20085                                | [Ch][OAc]                                 |
| 104 | 4                      | 0.05                    | 83             | 0.4066                     | 170    | 30                  | 1.627E-04                                             | 2499                                 | Urea/ZnCl <sub>2</sub> DES                |
| 105 | 15                     | 0.06                    | 88             | 1.330                      | 180    | 120                 | 4.074E-05                                             | 32634                                | K <sub>2</sub> CO <sub>3</sub> /EG DES    |
| 106 | 4                      | 0.05                    | 82             | 0.4116                     | 190    | 20                  | 2.158E-04                                             | 1907                                 | 1,3-Dimethylurea/(ZnOAc) <sub>2</sub> DES |

POM = polyoxometalate, DES = Deep eutectic solvent

**Table S6.** Summary of main results found in literature for glycolysis of PET assisted by heterogeneous catalysts

| Ref | Solvent/PET mass ratio | Catalyst/PET mass ratio | Yield BHET (%) | Environmental factor (a.u) | T (°C) | Reaction time (min) | Pressure (bar) | Energy economy (°C* <sup>-1</sup> min <sup>-1</sup> ) | Environmental energy impact (°C*min) | Catalyst                                                                    |
|-----|------------------------|-------------------------|----------------|----------------------------|--------|---------------------|----------------|-------------------------------------------------------|--------------------------------------|-----------------------------------------------------------------------------|
| 108 | 6.5                    | 0.05                    | 0.801          | 0.6554                     | 190    | 180                 | 1              | 2.342E-05                                             | 27985                                | CaO/MCF                                                                     |
| 108 | 6.5                    | 0.05                    | 0.719          | 0.7302                     | 190    | 180                 | 1              | 2.102E-05                                             | 34732                                | CaO/SBA-15                                                                  |
| 109 | 15                     | 0.01                    | 0.76           | 1.4901                     | 192    | 120                 | 1              | 3.299E-05                                             | 45175                                | CaO (calcined ostrich eggshells)                                            |
| 109 | 15                     | 0.01                    | 0.72           | 1.5729                     | 192    | 120                 | 1              | 3.125E-05                                             | 50333                                | CaO (calcined chicken eggshells)                                            |
| 110 | 8                      | 0.01                    | 0.5            | 1.2150                     | 196    | 120                 | 1              | 2.126E-05                                             | 57154                                | RZnO                                                                        |
| 110 | 8                      | 0.01                    | 0.8            | 0.7594                     | 196    | 120                 | 1              | 3.401E-05                                             | 22326                                | Co/RZnO                                                                     |
| 112 | 3.7                    | 0.01                    | 0.9            | 0.3167                     | 300    | 80                  | 11             | 3.750E-05                                             | 8444                                 | Mn <sub>3</sub> O <sub>4</sub> /SNPs                                        |
| 112 | 3.7                    | 0.01                    | 0.85           | 0.3353                     | 300    | 80                  | 11             | 3.542E-05                                             | 9467                                 | ZnO/SNPs                                                                    |
| 112 | 3.7                    | 0.01                    | 0.75           | 0.3800                     | 300    | 80                  | 11             | 3.125E-05                                             | 12160                                | Mn <sub>3</sub> O <sub>4</sub> /SMPs                                        |
| 112 | 3.7                    | 0.01                    | 0.65           | 0.4385                     | 300    | 80                  | 11             | 2.708E-05                                             | 16189                                | ZnO/SMPs                                                                    |
| 113 | 3.7                    | 0.01                    | 0.907          | 0.3142                     | 270    | 80                  | 1              | 4.199E-05                                             | 7483                                 | ZnO/60-nm silica                                                            |
| 113 | 3.7                    | 0.01                    | 0.853          | 0.3341                     | 270    | 80                  | 1              | 3.949E-05                                             | 8461                                 | ZnO/750-nm silica                                                           |
| 113 | 3.7                    | 0.01                    | 0.827          | 0.3446                     | 270    | 80                  | 1              | 3.829E-05                                             | 9001                                 | CeO <sub>2</sub> /60-nm silica                                              |
| 113 | 3.7                    | 0.01                    | 0.786          | 0.3626                     | 270    | 80                  | 1              | 3.639E-05                                             | 9964                                 | CeO <sub>2</sub> /750-nm silica                                             |
| 114 | 5.6                    | 0.01                    | 0.74           | 0.5777                     | 260    | 80                  | 5              | 3.558E-05                                             | 16238                                | Mn <sub>3</sub> O <sub>4</sub> spinel (tetragonal)                          |
| 114 | 5.6                    | 0.01                    | 0.81           | 0.5278                     | 260    | 80                  | 5              | 3.894E-05                                             | 13553                                | ZnCo <sub>2</sub> O <sub>4</sub> spinel (cubic)                             |
| 114 | 5.6                    | 0.01                    | 0.89           | 0.4803                     | 260    | 80                  | 5              | 4.279E-05                                             | 11226                                | CoMn <sub>2</sub> O <sub>4</sub> spinel (tetragonal)                        |
| 114 | 5.6                    | 0.01                    | 0.922          | 0.4637                     | 260    | 60                  | 5              | 5.910E-05                                             | 7845                                 | ZnMn <sub>2</sub> O <sub>4</sub> spinel (tetragonal)                        |
| 114 | 1.8                    | 0.01                    | 0.84           | 0.1696                     | 260    | 60                  | 5              | 5.385E-05                                             | 3151                                 | ZnMn <sub>2</sub> O <sub>4</sub> spinel (tetragonal)                        |
| 115 | 3.7                    | 0.05                    | 0.9            | 0.3500                     | 300    | 60                  | 11             | 5.000E-05                                             | 7000                                 | γ-Fe <sub>2</sub> O <sub>3</sub> nanoparticles                              |
| 115 | 3.7                    | 0.1                     | 0.8            | 0.4406                     | 255    | 80                  | 11             | 3.922E-05                                             | 11236                                | γ-Fe <sub>2</sub> O <sub>3</sub> nanoparticles                              |
| 118 | 10                     | 0.05                    | 1              | 0.7875                     | 190    | 120                 | 1              | 4.386E-05                                             | 17955                                | Fe <sub>3</sub> O <sub>4</sub> -boosted MWCNT                               |
| 119 | 13.3                   | 0.1                     | 1              | 1.073                      | 195    | 180                 | 1              | 2.849E-05                                             | 37645                                | γ-Fe <sub>2</sub> O <sub>3</sub> /N-doped graphene                          |
| 120 | 11                     | 0.15                    | 1              | 0.9375                     | 190    | 1440                | 1              | 3.655E-06                                             | 256500                               | Fe <sub>3</sub> O <sub>4</sub> @SiO <sub>2</sub> @(mim)[FeCl <sub>4</sub> ] |
| 116 | 3.7                    | 0.01                    | 0.964          | 0.2956                     | 300    | 180                 | 11             | 1.785E-05                                             | 16561                                | GO-Mn <sub>3</sub> O <sub>4</sub> nanocomposite                             |
| 116 | 3.7                    | 0.01                    | 0.827          | 0.3446                     | 300    | 180                 | 11             | 1.531E-05                                             | 22502                                | Mn <sub>3</sub> O <sub>4</sub>                                              |

|     |      |        |       |        |     |     |   |           |       |                                                     |
|-----|------|--------|-------|--------|-----|-----|---|-----------|-------|-----------------------------------------------------|
| 117 | 18.5 | 0.0001 | 1     | 1.3876 | 200 | 10  | 1 | 5.000E-04 | 2775  | MnO <sub>2</sub> /holey GO nanosheets               |
| 85  | 4    | 0.003  | 0.767 | 0.3941 | 196 | 120 | 1 | 3.261E-05 | 12084 | TNT (Titanate Nanotubes)                            |
| 121 | 5    | 0.01   | 0.82  | 0.4665 | 196 | 50  | 1 | 8.367E-05 | 5575  | Mg-Al hydrotalcites                                 |
| 107 | 5.5  | 0.003  | 0.73  | 0.5682 | 180 | 180 | 1 | 2.253E-05 | 25217 | SO <sub>4</sub> <sup>2-</sup> /ZnO-TiO <sub>2</sub> |
| 122 | 5    | 0.004  | 0.832 | 0.4543 | 196 | 25  | 1 | 1.698E-04 | 2676  | Acetamide/ZnCl <sub>2</sub> DES@Zif-8               |
| 111 | 5.2  | 0.1    | 0.79  | 0.5886 | 190 | 90  | 1 | 4.620E-05 | 12741 | Orange Peel Ash                                     |

---

MCF=Mesocellular siliceous foam, SBA=mesoporous silica materials, SNP=silica nanoparticles, SMP=silica microparticles



**Table S7** Summary of main results found in literature for aminolysis of PET assisted by homogeneous single catalysts

| Ref | Solvent/PET mass ratio | catalyst/PET mass ratio | Yield TPA | Environmental factor (u.a) | T (°C) | Reaction time (min) | Energy economy (°C*<br>1min-1) | Environmental energy impact (°C*min) | Solvent/Buffer  | Catalyst/Enzyme  |
|-----|------------------------|-------------------------|-----------|----------------------------|--------|---------------------|--------------------------------|--------------------------------------|-----------------|------------------|
| 126 | 10                     | 0,01                    | 0,31      | 3,225                      | 40     | 4320                | 1,79E-06                       | 1,80E+06                             | Methylamine     | CAMBr            |
| 126 | 10                     | 0,01                    | 0,45      | 2,222                      | 40     | 10080               | 1,12E-06                       | 1,99E+06                             | Methylamine     | CAMBr            |
| 126 | 10                     | 0,01                    | 0,56      | 1,786                      | 40     | 21600               | 6,48E-07                       | 2,75E+06                             | Methylamine     | CAMBr            |
| 126 | 10                     | 0,01                    | 0,63      | 1,587                      | 40     | 30240               | 5,21E-07                       | 3,05E+06                             | Methylamine     | CAMBr            |
| 126 | 10                     | 0,01                    | 0,7       | 1,428                      | 40     | 36000               | 4,86E-07                       | 2,94E+06                             | Methylamine     | CAMBr            |
| 126 | 10                     | 0,01                    | 0,79      | 1,266                      | 40     | 43200               | 4,57E-07                       | 2,77E+06                             | Methylamine     | CAMBr            |
| 126 | 10                     | 0,01                    | 0,94      | 1,064                      | 40     | 64800               | 3,05E-07                       | 3,49E+06                             | Methylamine     | CAMBr            |
| 126 | 10                     | 0                       | 0,15      | 6,600                      | 40     | 4320                | 5,44E-06                       | 1,21E+06                             | Methylamine     | CAMBr            |
| 126 | 10                     | 0                       | 0,26      | 3,808                      | 40     | 10080               | 3,72E-07                       | 1,02E+07                             | Methylamine     | CAMBr            |
| 126 | 10                     | 0                       | 0,42      | 2,357                      | 40     | 21600               | 3,01E-07                       | 7,83E+06                             | Methylamine     | CAMBr            |
| 126 | 10                     | 0                       | 0,57      | 1,737                      | 40     | 30240               | 3,47E-07                       | 5,00E+06                             | Methylamine     | CAMBr            |
| 126 | 10                     | 0                       | 0,62      | 1,597                      | 40     | 36000               | 3,96E-07                       | 4,03E+06                             | Methylamine     | CAMBr            |
| 126 | 10                     | 0                       | 0,68      | 1,456                      | 40     | 43200               | 3,59E-07                       | 4,06E+06                             | Methylamine     | CAMBr            |
| 126 | 10                     | 0                       | 0,84      | 1,179                      | 40     | 64800               | 2,62E-07                       | 4,49E+06                             | Methylamine     | CAMBr            |
| 127 | 6                      | 0,007                   | 0,782     | 0,585                      | 180    | 480                 | 9,72E-06                       | 6,02E+04                             | Ethanolamine    | NaOAc            |
| 127 | 6                      | 0,01                    | 0,832     | 0,553                      | 180    | 480                 | 9,05E-06                       | 6,11E+04                             | Ethanolamine    | NaOAc            |
| 127 | 6                      | 0,015                   | 0,71      | 0,653                      | 180    | 480                 | 9,63E-06                       | 6,78E+04                             | Ethanolamine    | NaOAc            |
| 127 | 6                      | 0,007                   | 0,612     | 0,748                      | 180    | 480                 | 8,22E-06                       | 9,10E+04                             | Ethanolamine    | AcAcid           |
| 127 | 6                      | 0,01                    | 0,682     | 0,674                      | 180    | 480                 | 7,08E-06                       | 9,52E+04                             | Ethanolamine    | AcAcid           |
| 127 | 6                      | 0,015                   | 0,603     | 0,769                      | 180    | 480                 | 7,89E-06                       | 9,74E+04                             | Ethanolamine    | AcAcid           |
| 127 | 6                      | 0,007                   | 0,64      | 0,715                      | 180    | 480                 | 6,98E-06                       | 1,02E+05                             | Ethanolamine    | KSO <sub>3</sub> |
| 127 | 6                      | 0,01                    | 0,741     | 0,621                      | 180    | 480                 | 7,41E-06                       | 8,38E+04                             | Ethanolamine    | KSO <sub>3</sub> |
| 127 | 6                      | 0,015                   | 0,68      | 0,682                      | 180    | 480                 | 8,58E-06                       | 7,95E+04                             | Ethanolamine    | KSO <sub>3</sub> |
| 133 | 2,08                   | 0,0325                  | 1         | 0,181                      | 190    | 3                   | 1,19E-03                       | 1,52E+02                             | Ethanolamine    | M4HPP            |
| 133 | 3,125                  | 0,0325                  | 1         | 0,262                      | 120    | 10                  | 8,33E-04                       | 3,15E+02                             | Ethylenediamine | M4HPP            |

|     |      |        |      |       |     |     |          |          |                   |                      |
|-----|------|--------|------|-------|-----|-----|----------|----------|-------------------|----------------------|
| 131 | 1,68 | 0,0017 | 0,72 | 0,132 | 190 | 432 | 1,22E-05 | 1,09E+04 | Phenylenediamine  | TBD                  |
| 131 | 1,7  | 0,0017 | 0,72 | 0,137 | 190 | 432 | 8,77E-06 | 1,57E+04 | Pyridine diamine  | TBD                  |
| 131 | 1,03 | 0,0017 | 0,93 | 0,085 | 120 | 120 | 5,00E-05 | 1,70E+03 | Ethanolamine      | TBD                  |
| 131 | 1,01 | 0,0017 | 0,89 | 0,088 | 110 | 60  | 1,41E-04 | 6,22E+02 | Ethylenediamine   | TBD                  |
| 132 | 2    | 0,1    | 0,9  | 0,136 | 200 | 4   | 1,11E-03 | 1,23E+02 | Isophorenediamine | Zn(OAc) <sub>2</sub> |

**Table S8** Summary of main results found in literature for aminolysis of PET assisted by heterogeneous catalysts and complex homogeneous catalyst systems

| Ref | Solvent/PET mass ratio | catalyst/PET mass ratio | Yield TPA | Environmental factor (u.a) | T (°C) | Reaction time (min) | Energy economy (°C* <sub>-</sub> 1min <sup>-1</sup> ) | Environmental energy impact (°C*min) | Solvent/Buffer | Catalyst/Enzyme   |
|-----|------------------------|-------------------------|-----------|----------------------------|--------|---------------------|-------------------------------------------------------|--------------------------------------|----------------|-------------------|
| 134 | 6                      | 0,005                   | 0,49      | 0,931                      | 190    | 240                 | 1,07E-05                                              | 8,66E+04                             | Ethanolamine   | DBTO              |
| 134 | 6                      | 0,01                    | 0,52      | 1,349                      | 190    | 240                 | 1,14E-05                                              | 1,18E+05                             | Ethanolamine   | DBTO              |
| 134 | 6                      | 0,005                   | 0,54      | 1,288                      | 190    | 120                 | 2,37E-05                                              | 5,44E+04                             | Ethanolamine   | DBTO              |
| 134 | 6                      | 0,01                    | 0,56      | 1,253                      | 190    | 120                 | 2,46E-05                                              | 5,10E+04                             | Ethanolamine   | DBTO              |
| 134 | 6                      | 0,005                   | 0,6       | 1,160                      | 190    | 60                  | 5,26E-05                                              | 2,20E+04                             | Ethanolamine   | DBTO              |
| 134 | 6                      | 0,01                    | 0,62      | 1,131                      | 190    | 60                  | 5,44E-05                                              | 2,08E+04                             | Ethanolamine   | DBTO              |
| 135 | 6                      | 0,002                   | 0,39      | 1,775                      | 190    | 240                 | 8,55E-06                                              | 2,08E+05                             | Ethanolamine   | Beta Zeolite      |
| 135 | 6                      | 0,005                   | 0,64      | 1,087                      | 190    | 240                 | 1,40E-05                                              | 7,75E+04                             | Ethanolamine   | Beta zeolite      |
| 135 | 6                      | 0,01                    | 0,85      | 0,825                      | 190    | 240                 | 1,86E-05                                              | 4,43E+04                             | Ethanolamine   | Beta zeolite      |
| 135 | 6                      | 0,012                   | 0,85      | 0,828                      | 190    | 240                 | 1,86E-05                                              | 4,44E+04                             | Ethanolamine   | Beta zeolite      |
| 135 | 6                      | 0,002                   | 0,62      | 1,117                      | 190    | 240                 | 1,36E-05                                              | 8,21E+04                             | Ethanolamine   | Mmt KSF           |
| 135 | 6                      | 0,004                   | 0,73      | 0,952                      | 190    | 240                 | 1,60E-05                                              | 5,94E+04                             | Ethanolamine   | Mmt KSF           |
| 135 | 6                      | 0,005                   | 0,86      | 0,809                      | 190    | 240                 | 1,89E-05                                              | 4,29E+04                             | Ethanolamine   | Mmt KSF           |
| 135 | 6                      | 0,006                   | 0,86      | 0,810                      | 190    | 240                 | 1,89E-05                                              | 4,30E+04                             | Ethanolamine   | Mmt KSF           |
| 136 | 1                      | 0,01                    | 0,28      | 0,381                      | 65     | 180                 | 2,39E-05                                              | 1,59E+04                             | hydrazine      | NaCO <sub>3</sub> |
| 136 | 2                      | 0,01                    | 0,66      | 0,309                      | 65     | 180                 | 5,64E-05                                              | 5,47E+03                             | hydrazine      | NaCO <sub>3</sub> |
| 136 | 3                      | 0,01                    | 0,84      | 0,358                      | 65     | 180                 | 7,18E-05                                              | 4,99E+03                             | hydrazine      | NaCO <sub>3</sub> |

|     |   |      |      |       |     |     |          |          |                |                                         |
|-----|---|------|------|-------|-----|-----|----------|----------|----------------|-----------------------------------------|
| 136 | 4 | 0,01 | 0,85 | 0,468 | 65  | 180 | 7,26E-05 | 6,44E+03 | hydrazine      | NaCO <sub>3</sub>                       |
| 137 | 6 | 0,05 | 0,72 | 0,504 | 270 | 30  | 8,89E-05 | 5,67E+03 | diethanolamine | ZnCl <sub>2</sub>                       |
| 137 | 6 | 0,05 | 0,66 | 0,550 | 270 | 30  | 8,15E-05 | 6,74E+03 | diethanolamine | urea                                    |
| 137 | 6 | 0,05 | 0,77 | 0,471 | 270 | 30  | 9,51E-05 | 4,96E+03 | diethanolamine | [ChCl][ZnCl <sub>2</sub> ]              |
| 137 | 6 | 0,05 | 0,95 | 0,382 | 270 | 30  | 1,17E-04 | 3,26E+03 | diethanolamine | [ChCl][ZnCl <sub>2</sub> ] <sub>2</sub> |
| 137 | 6 | 0,05 | 0,83 | 0,437 | 270 | 30  | 1,02E-04 | 4,26E+03 | diethanolamine | [ChCl][ZnCl <sub>2</sub> ] <sub>3</sub> |
| 137 | 6 | 0,05 | 0,8  | 0,453 | 270 | 30  | 9,88E-05 | 4,59E+03 | diethanolamine | [ChCl][urea] <sub>2</sub>               |

**Table S9.** List of organisations focussing in chemical depolymerization technologies of PET waste

| <b>Company</b>                                | <b>Plastic Stream</b>                                                                                                                                                                                                                                                                            | <b>Method</b>              | <b>Catalyst</b>                | <b>Industrial Maturity</b>                                                                                                                                                         |
|-----------------------------------------------|--------------------------------------------------------------------------------------------------------------------------------------------------------------------------------------------------------------------------------------------------------------------------------------------------|----------------------------|--------------------------------|------------------------------------------------------------------------------------------------------------------------------------------------------------------------------------|
| <b>PerPETual Global Technologies</b>          | <ul style="list-style-type: none"> <li>▪ PET Bottles</li> </ul>                                                                                                                                                                                                                                  | Glycolysis                 | No information available       | Commercial plant operational, retrofitted with technology, processes 2 million PET bottles/day into filament yarns                                                                 |
| <b>Ioniqa Technologies</b>                    | <ul style="list-style-type: none"> <li>▪ PET Bottles</li> <li>▪ Multi-layered trays</li> <li>▪ Polyester textiles</li> </ul>                                                                                                                                                                     | Glycolysis                 | Ionic capture complex          | Pilot plant operational (10,000 kilotons/year), plan to scale up to 50,000+ kilotons.                                                                                              |
| <b>Garbo (ChemPET Technology)</b>             | <ul style="list-style-type: none"> <li>▪ Opaque PET bottles</li> <li>▪ Multi-layer thermoforming scraps/trays</li> <li>▪ Multi-layer film</li> <li>▪ Coloured PET powders and fines</li> <li>▪ Black PET trays</li> <li>▪ Polyester/cotton textile blends</li> <li>▪ PET/PP strapping</li> </ul> | Glycolysis                 | No information available       | Pilot plant in operation (1000 tons/year), plans for commercial scale plant underway.                                                                                              |
| <b>Jeplan (BRING Technology)</b>              | <ul style="list-style-type: none"> <li>▪ Coloured /clear PET bottles</li> <li>▪ Polyester textiles</li> </ul>                                                                                                                                                                                    | Glycolysis                 | Sodium methylate               | Two plants in operation; commercial PET bottles recycling plant (22 kilotons/year) and demonstration plant for textile to textile recycling (2 kilotons/year).                     |
| <b>IBM (VolCat technology)</b>                | <ul style="list-style-type: none"> <li>▪ Coloured or clear PET bottles</li> <li>▪ Containers</li> <li>▪ Dirty or clean plastic waste stream</li> </ul>                                                                                                                                           | Glycolysis                 | Volatile organocatalyst        | VolCat Technology is still at laboratory scale and has not yet been commercialized, currently seeking industry partners.                                                           |
| <b>Gr3n (DEMETO technology)</b>               | <ul style="list-style-type: none"> <li>▪ PET Bottles</li> <li>▪ Food containers</li> <li>▪ Polyester textiles</li> </ul>                                                                                                                                                                         | Hydrolysis                 | *Microwave assisted technology | Industrial-scale demonstration plant (capacity not known) under construction, pilot plant running since 2015 (capacity not known).                                                 |
| <b>Carbios</b>                                | <ul style="list-style-type: none"> <li>▪ PET Bottles</li> <li>▪ Polyester textiles</li> </ul>                                                                                                                                                                                                    | Hydrolysis                 | Enzyme                         | Process optimisation complete at laboratory level. Industrial-scale demonstration plant in construction, scheduled to launch in 2021 (estimated capacity 50 – 100 kilotons /year). |
| <b>Eastman (Polyester Renewal Technology)</b> | <ul style="list-style-type: none"> <li>▪ PET Waste, type unknown</li> </ul>                                                                                                                                                                                                                      | Glycolysis or methanolysis | No information available       | Methanolysis process at pilot stage, commercial facility planned for the end of 2022. Maturity not known.                                                                          |
